# Supplementary material for: A new buckwheat dihydroflavonol 4-reductase (DFR), with a unique substrate binding structure, has altered substrate specificity
Source: PubMed Central journal article supplement (PMC5725924; doi:10.1186/s12870-017-1200-6), 2017-12-11
Supplement: 12870_2017_1200_MOESM1_ESM.pdf [file 12870_2017_1200_MOESM1_ESM.pdf]

**Additional file 1.** Primer sets used for PCR

| Locus   | Forward                                                 | Reverse                                                 | Objectives                                         |
|---------|---------------------------------------------------------|---------------------------------------------------------|----------------------------------------------------|
| FeDFR1a | FeDFRdeg1F,<br>5'-GTNTTYCAYGTNGCNACNCCNATG-3'           | FeDFRdeg1R,<br>5'-ACRAARTACATCCATCCNGTCATYTT-3'         | Isolation                                          |
|         | FeDFR1aRTF,<br>5'-CATCGAAGAAGCTGACCGACGAA-3'            | FeDFR1aRTR,<br>5'-CCTTCAACACCTTCCATTCTCAC-3'            | RT-PCR                                             |
|         | FeDFR1aLinkF,<br>5'-CAAGATGACTGGATGGGTAAGTTC-3'         | FeDFR1aLinkR,<br>5'-CGAAGTACATCTGCATTTATAC-3'           | Linkage Analysis                                   |
|         | FeDFR1aCloF,<br>5'-TCGAATTCGATGGTTGCTGAGGGAGAGATCGTC-3' | FeDFR1aCloR,<br>5'-GGCGGCCGCTCAATGGCCATTACCATTTACA-3'   | Cloning for the production of recombinant protein  |
| FeDFR2  | FeDFRdeg2F,<br>5'-CGWGCMCYGTBCGWGA-3'                   | FeDFRdeg2R,<br>5'-CATRGGNGTKGCSACRT-3'                  | Isolation                                          |
|         | FeDFR2RTF,<br>5'-TCGTCTGCCGGGACTGTTGTT-3'               | FeDFR2RTR,<br>5'-CGTATGCCGGAACCTCGGACCCCAT-3'           | RT-PCR                                             |
|         | FeDFR2LinkF,<br>5'-GGCAAATTTGACACTGTGGAAGG-3'           | FeDFR2LinkR,<br>5'-AATGAAGGGTCCTACGACCAATG-3'           | Linkage Analysis                                   |
|         | FeDFR2CloF,<br>5'-AAGGATCCCATGGGTTTTGAAGGTGAAGTTGTG-3'  | FeDFR2CloR,<br>5'-GGCGGCCGCTTAATCTTAAACAGATACATTGTCG-3' | Cloning for the production of recombinant proteins |

The degenerate primers for FeDFR2 were used based on the procedure of Deng and Davis [18].

Degenerate PCR for FeDFR1a and FeDFR2 were performed using genome DNA and cDNA, respectively.
