# Supplementary material for: A new buckwheat dihydroflavonol 4-reductase (DFR), with a unique substrate binding structure, has altered substrate specificity
Source: PubMed Central journal article supplement (PMC5725924; doi:10.1186/s12870-017-1200-6), 2017-12-11
Supplement: 12870_2017_1200_MOESM2_ESM.pdf [file 12870_2017_1200_MOESM2_ESM.pdf]

**A**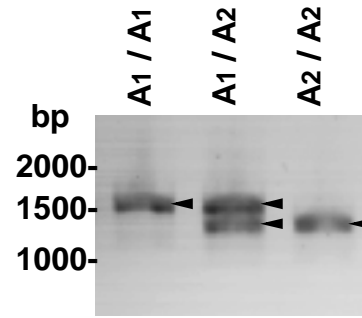**B**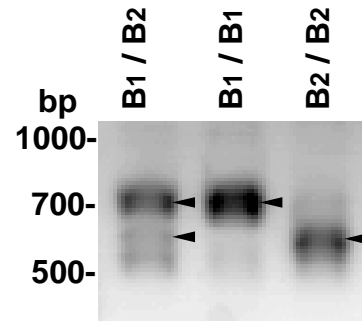**C**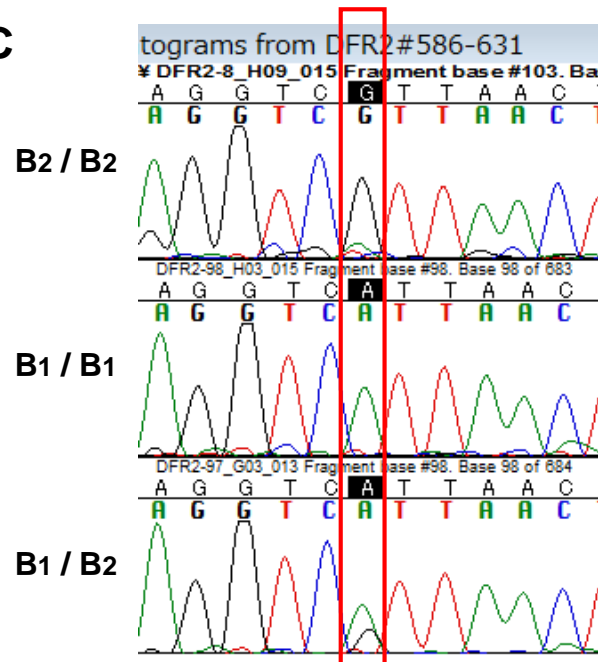**D**

|           |     |                                                                 |
|-----------|-----|-----------------------------------------------------------------|
| FeDFR1aA1 | 1   | GGATTTCAATTAGCATTATCCCAACTCTCGTTGTAGGCCCTTTCATTATGCCAAGTTTCCC   |
| FeDFR1aA2 | 1   | GGATTTCAATTAGCATTATCCCAACTCTCGTTGTAGGCCCTTTCATTATGCCAAGTTTCCC   |
| FeDFR1aA1 | 61  | TCCAAGTCTCATCACAGCTCTCTCCCAATAACAAGTAATTAAC TAATTTACCTTACAG     |
| FeDFR1aA2 | 61  | TCCAAGTCTCATCACAGCTCTCTCCCAATAACAAGTAATTAAC TAATTTACCTTACAG     |
| FeDFR1aA1 | 121 | TAAAAATGTTTCAGTAAAAAAA--GTAACCTTATTTTGTACACATATGTGCAGGAAGTGAAGG |
| FeDFR1aA2 | 121 | TAAAAATGTTTCAGTAAAAAAAAGTAACTTATTTTGTACACATATGTGCAGGAAGTGAAGG   |
| FeDFR1aA1 | 180 | TCACTACACAATCATAAAAACAATGTCAGTACGTACACTTGGACGATCTATGCATGTCTCA   |
| FeDFR1aA2 | 181 | TCACTACACAATCATAAAAACAATGTCAGTACGTACACTTGGACGATCTATGCATGTCTCA   |
| FeDFR1aA1 | 240 | CATTTACCTCTATGAGAAGGCTGGCTCTAAAGGGCGTTACGTTTGTCTTCCGACAATGC     |
| FeDFR1aA2 | 241 | CATTTACCTCTATGAGAAGGCTGGCTCTAAAGGGCGTTACGTTTGTCTTCCGACAATGC     |
| FeDFR1aA1 | 300 | TACCATTTACGACCTCGGCAAAATGCTCCGAAACAAGTATCCCGAGTACAATGTCCCTAC    |
| FeDFR1aA2 | 301 | TACCATTTACGACCTCGGCAAAATGCTCCGAAACAAGTATCCCGAGTACAATGTCCCTAC    |
| FeDFR1aA1 | 360 | CAAGTAAGATAAATGCGGACAAACCTTGACGTTTTTGAGTTTTGAGTTTTCGAGAAGGA     |
| FeDFR1aA2 | 361 | CAAGTAAGATAAATGCGGACAAACCTTGACGTTTTTGAGTTTTGAGTTTTCGAGAAGGA     |
| FeDFR1aA1 | 420 | AATTGTTGAGATGTAGGGAAAAATATCCCAATCGACAACACGCAATCTGGTGACATATAC    |
| FeDFR1aA2 | 421 | AATTGTTGAG-----CATCGACAACACGCAATCTGGTGACATATAC                  |
| FeDFR1aA1 | 461 | CATATAAGCATTCGGGTACTCCTCCTATCGTCAATGGTTTTAGGATGGAAGTCCGTGT      |
| FeDFR1aA2 | 480 | CATATAAGCATTCGGGTACTCCTCCTATCGTCAATGGTTTTAGGATGGAAGTCCGTGT      |
| FeDFR1aA1 | 521 | GTTTGTATGTGTGGTTCACGGACACGTCATTTGGTTGCGGGACGGATATAAGAAAAAGTA    |
| FeDFR1aA2 | 540 | GTTTGTATGTGTGGTTCACGGACACGTCATTTGGTTGCGGGACGGATATAAGAAAAAGTA    |
| FeDFR1aA1 | 581 | ACAGAAATTAATGAGTTGATAACGTTTTTTTTTATTGGATAGGTTTAGGGACTTCGAC      |
| FeDFR1aA2 | 600 | ACAGAAATTAATGAGTTGATAACGTTTTTTTTTATTGGATAGGTTTAGGGACTTCGAC      |
| FeDFR1aA1 | 641 | GAGAACATGGAAGCCGTGTCGTCTCATCGAA                                 |
| FeDFR1aA2 | 660 | GAGAACATGGAAGCCGTGTCGTCTCATCGAA                                 |
